# Supplementary material for: Are Tourists Facilitators of the Movement of Free-Ranging Dogs?
Source: MDPI journal article supplement (doi:10.3390/ani12243564), 2022-12-16
Supplement: s1 [file s1]

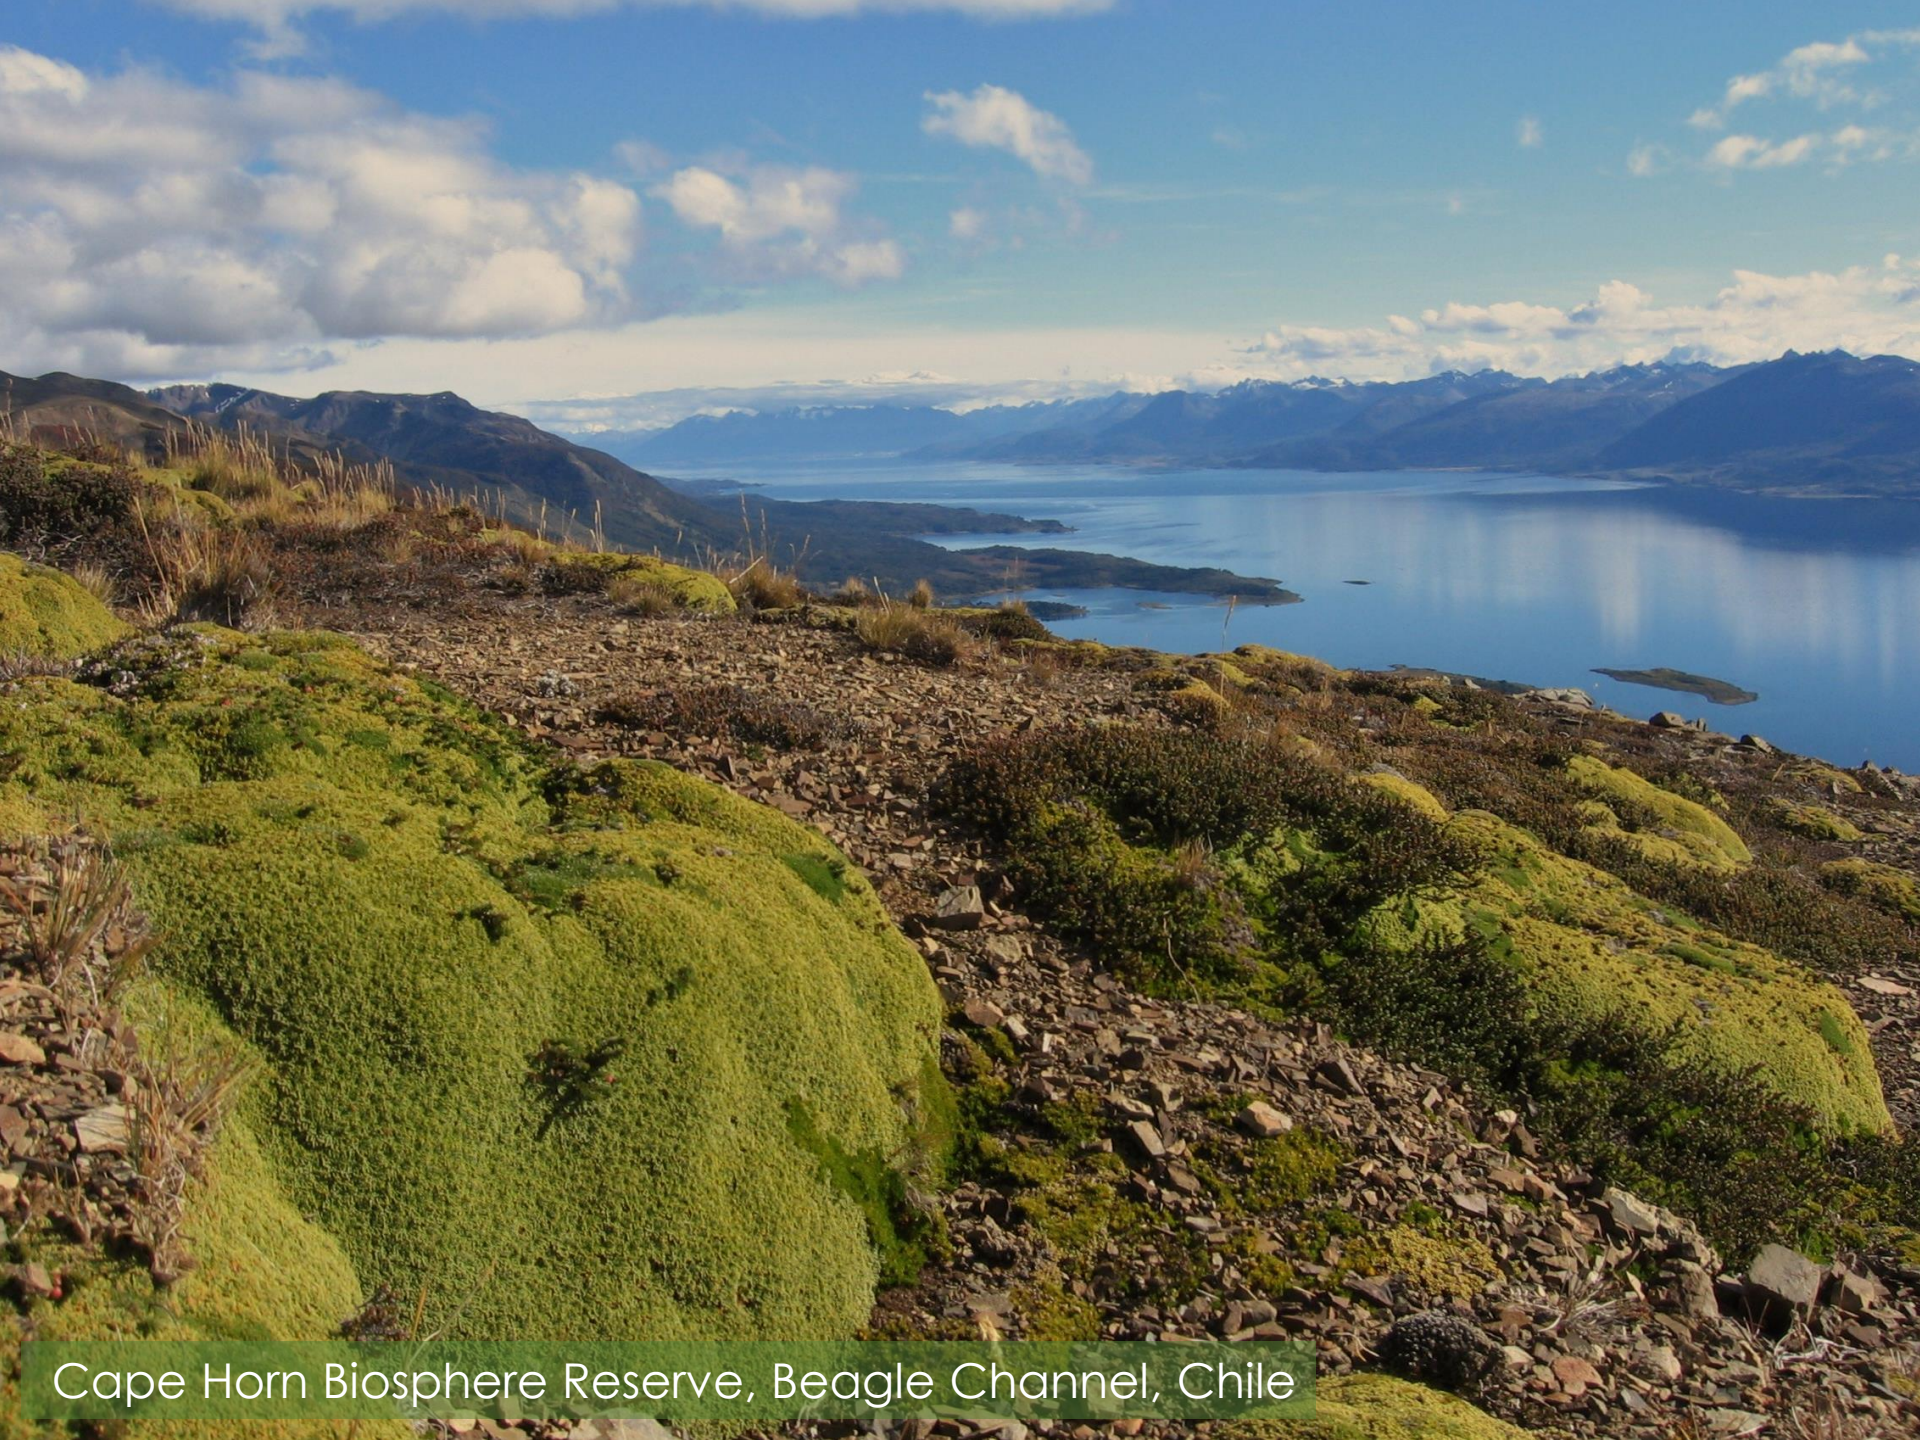

Cape Horn Biosphere Reserve, Beagle Channel, Chile



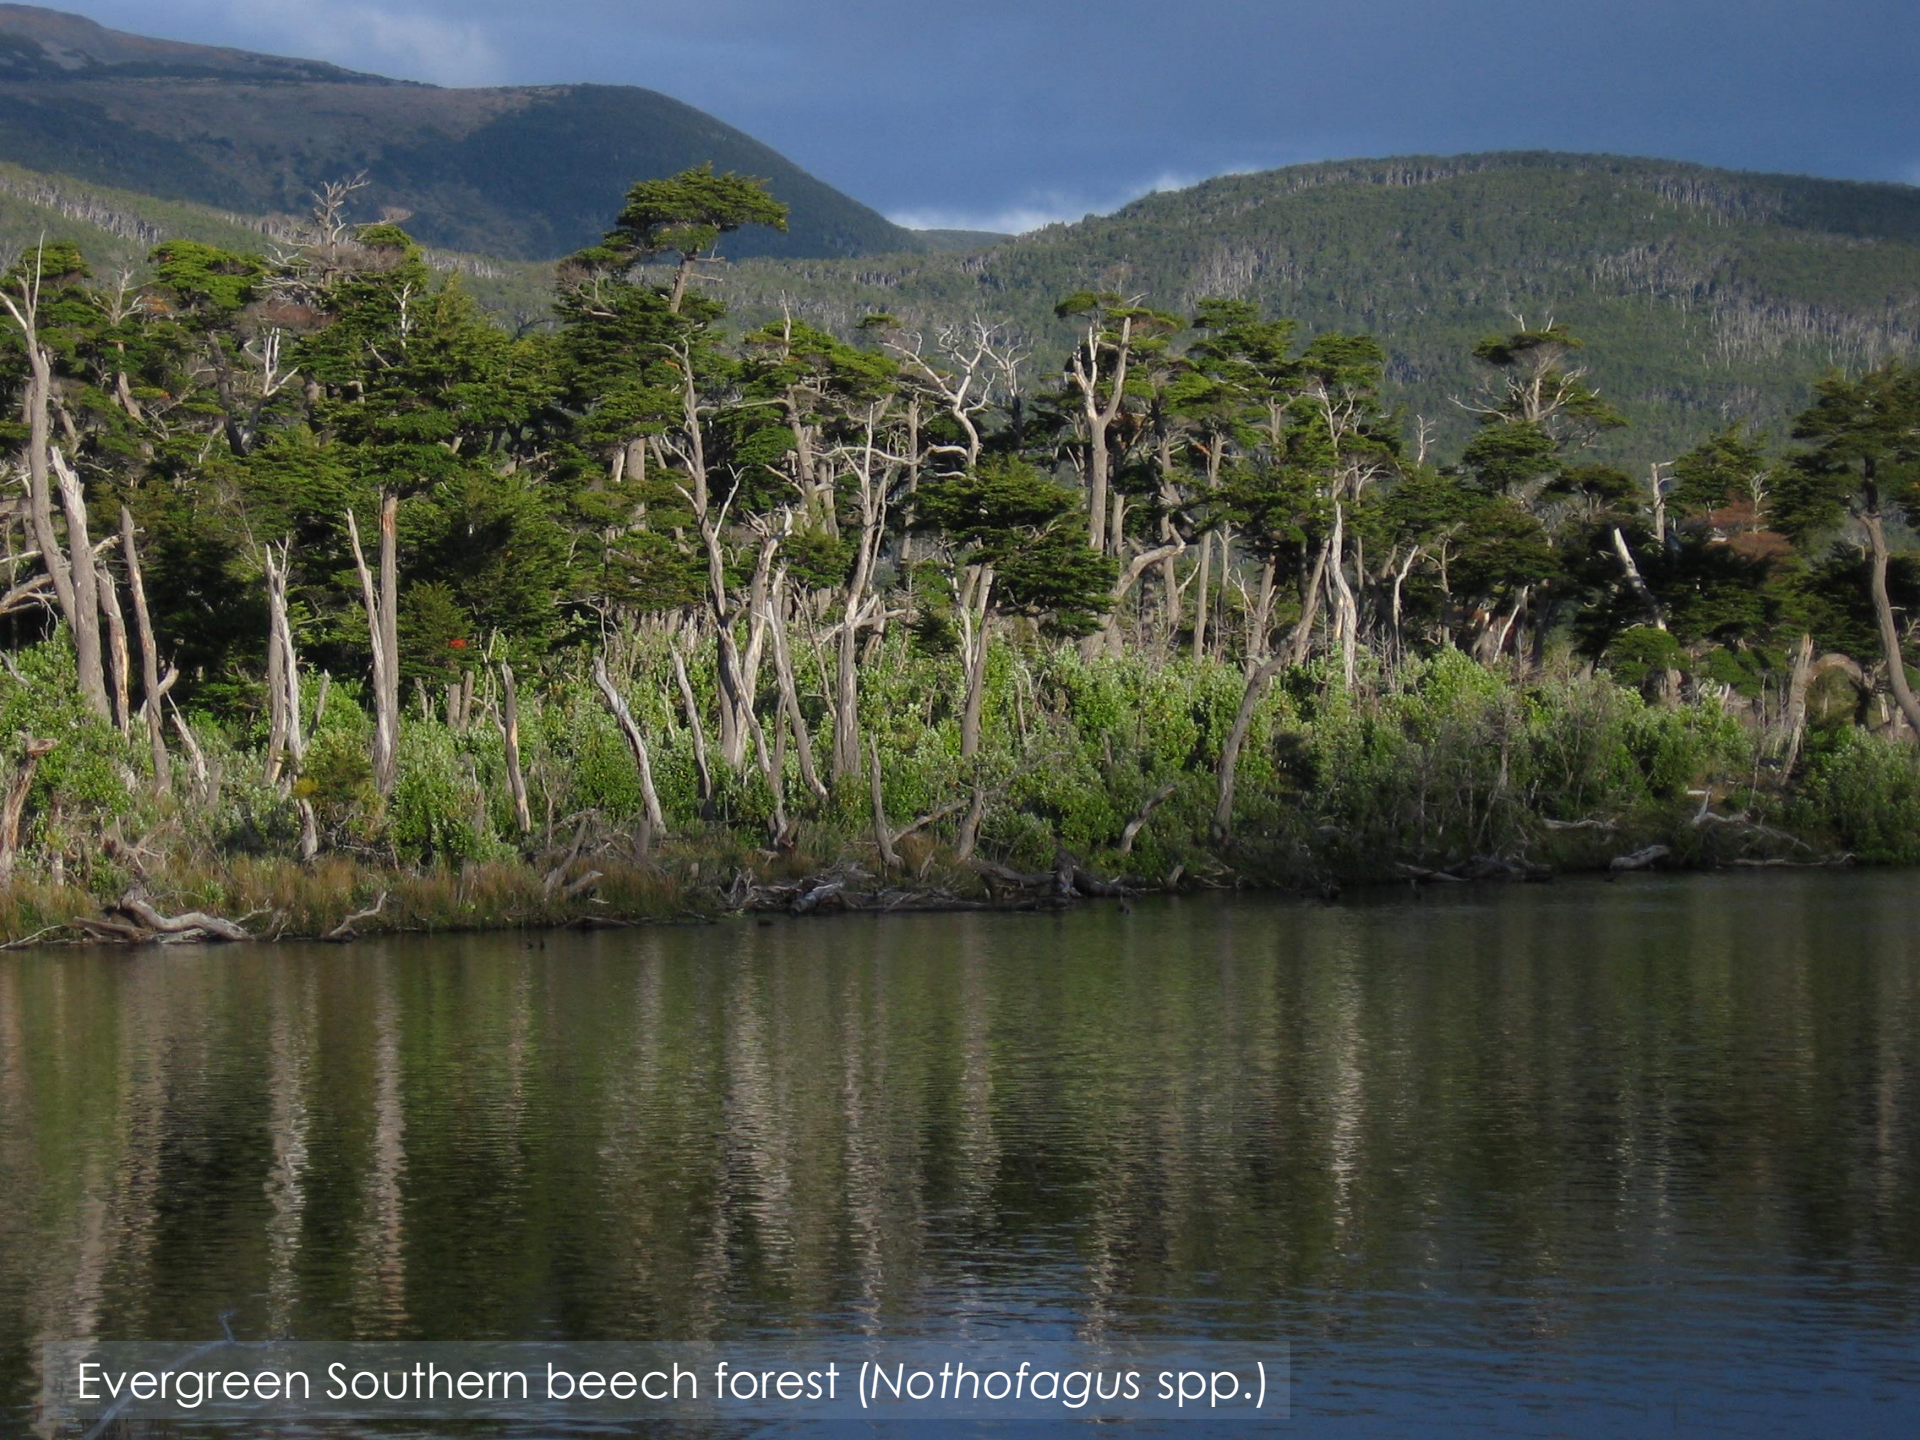

Evergreen Southern beech forest (*Nothofagus* spp.)



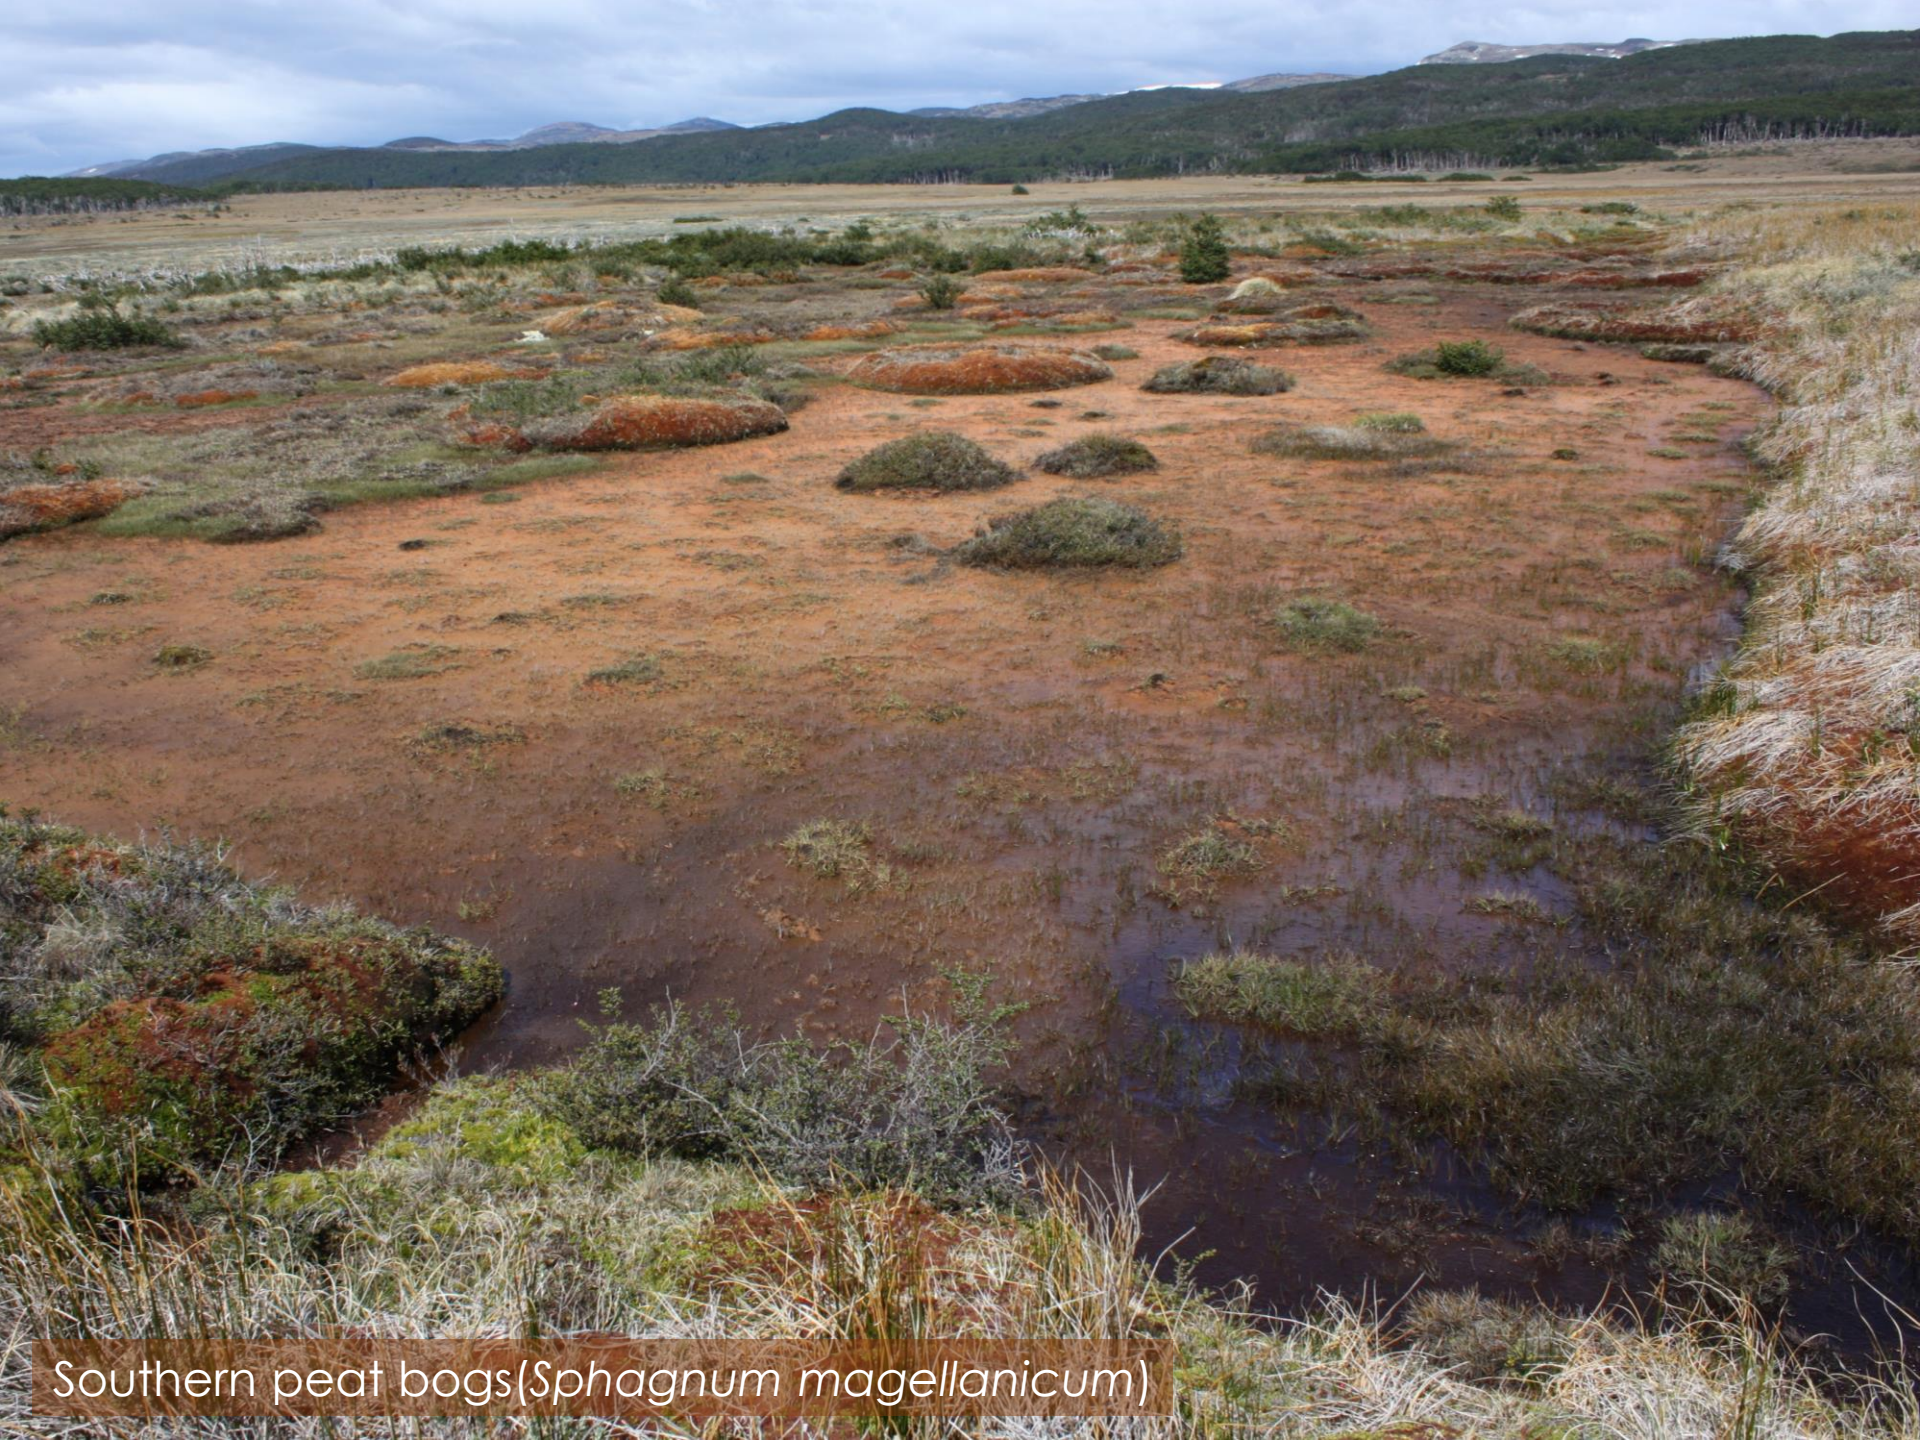

Southern peat bogs (*Sphagnum magellanicum*)



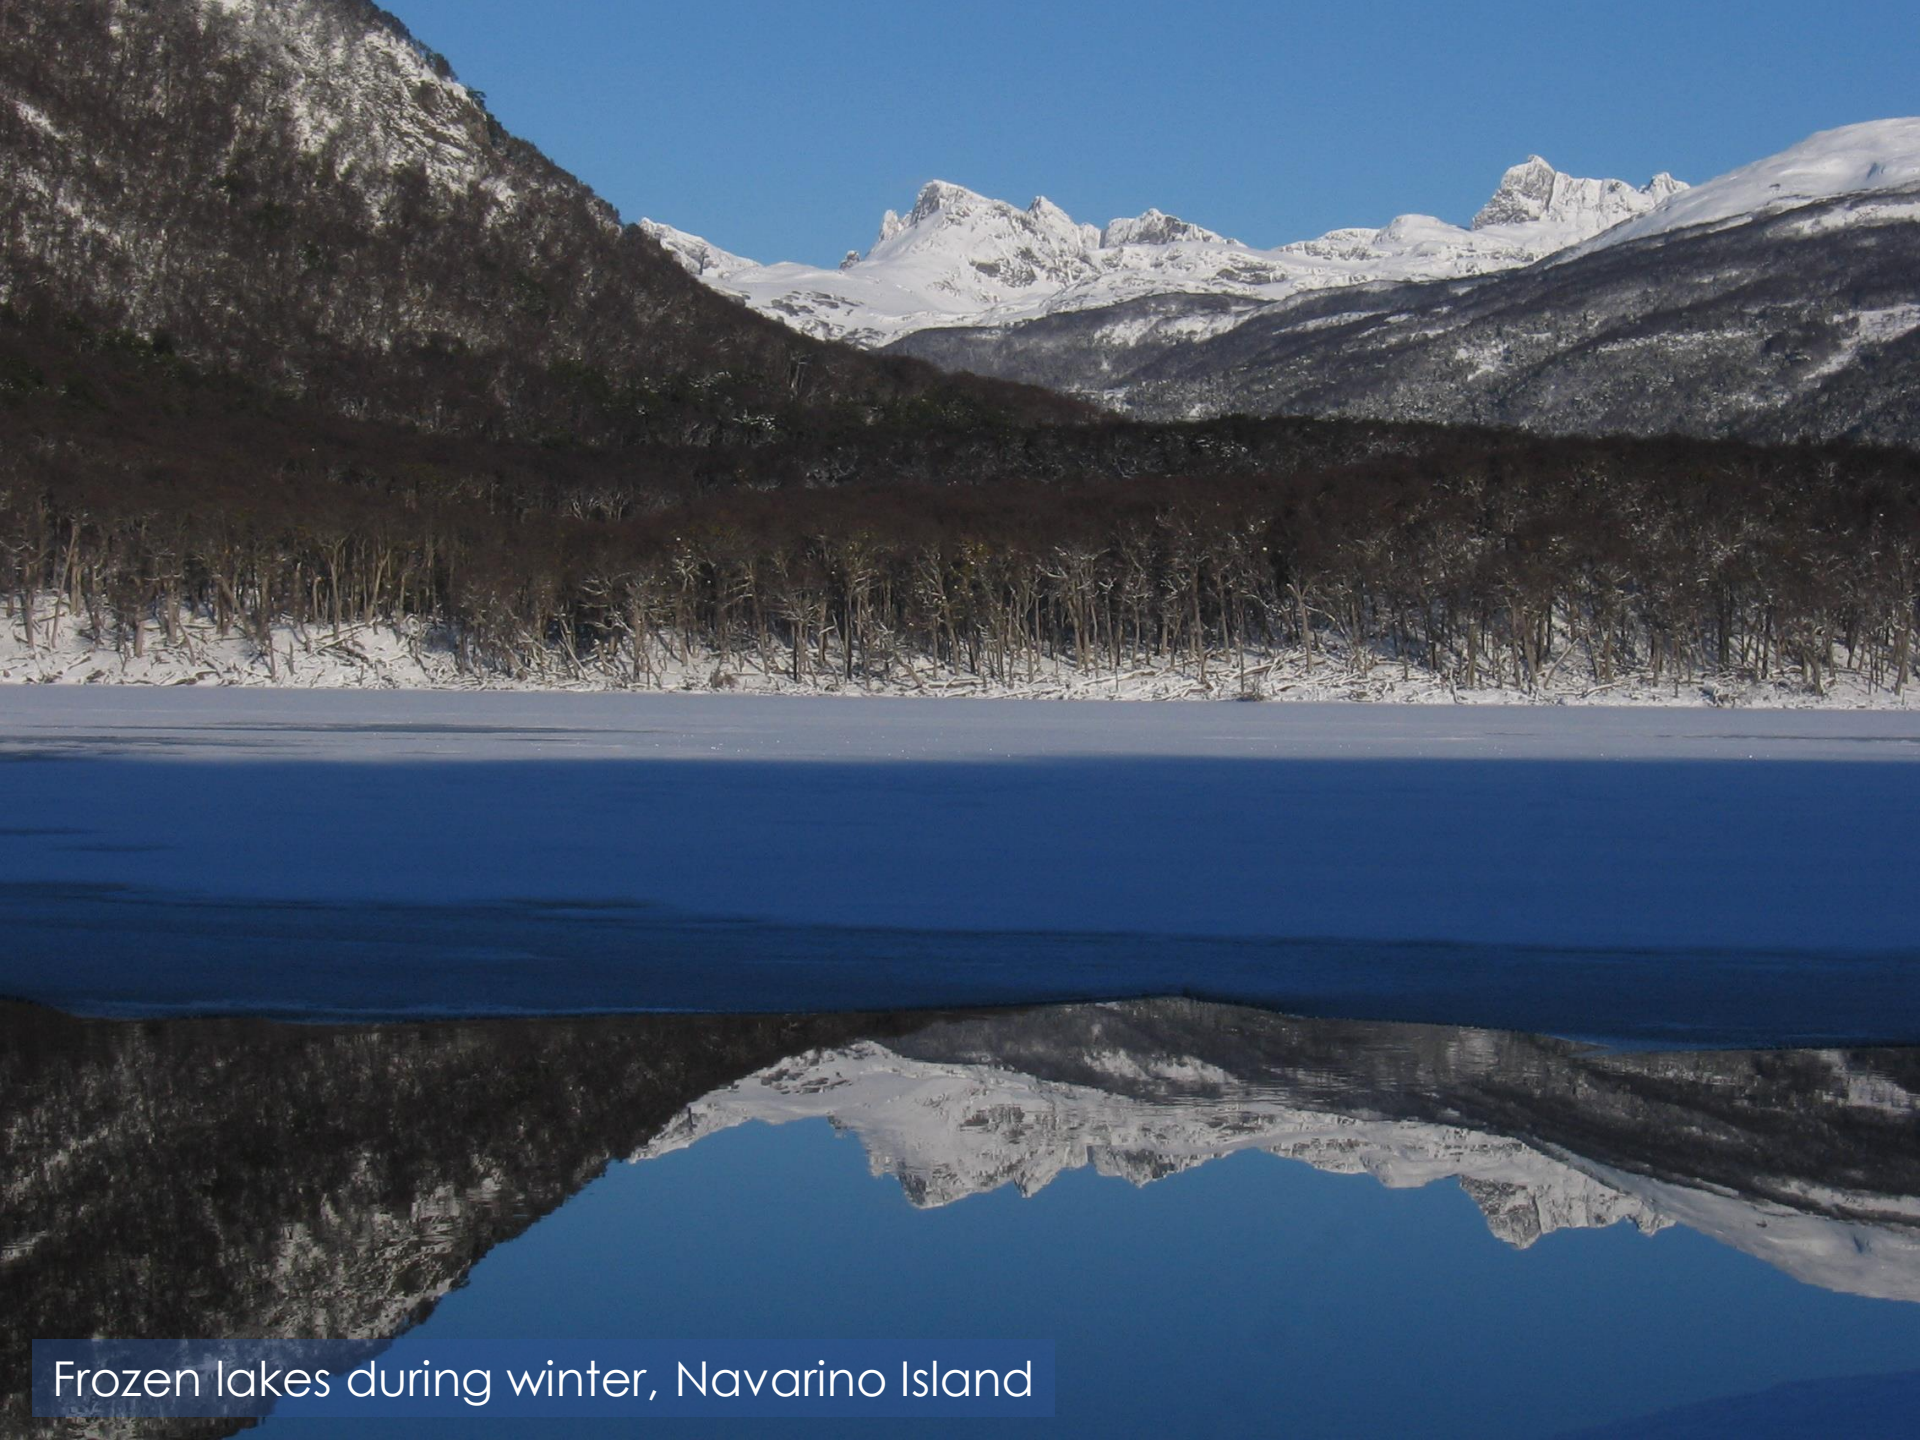

Frozen lakes during winter, Navarino Island



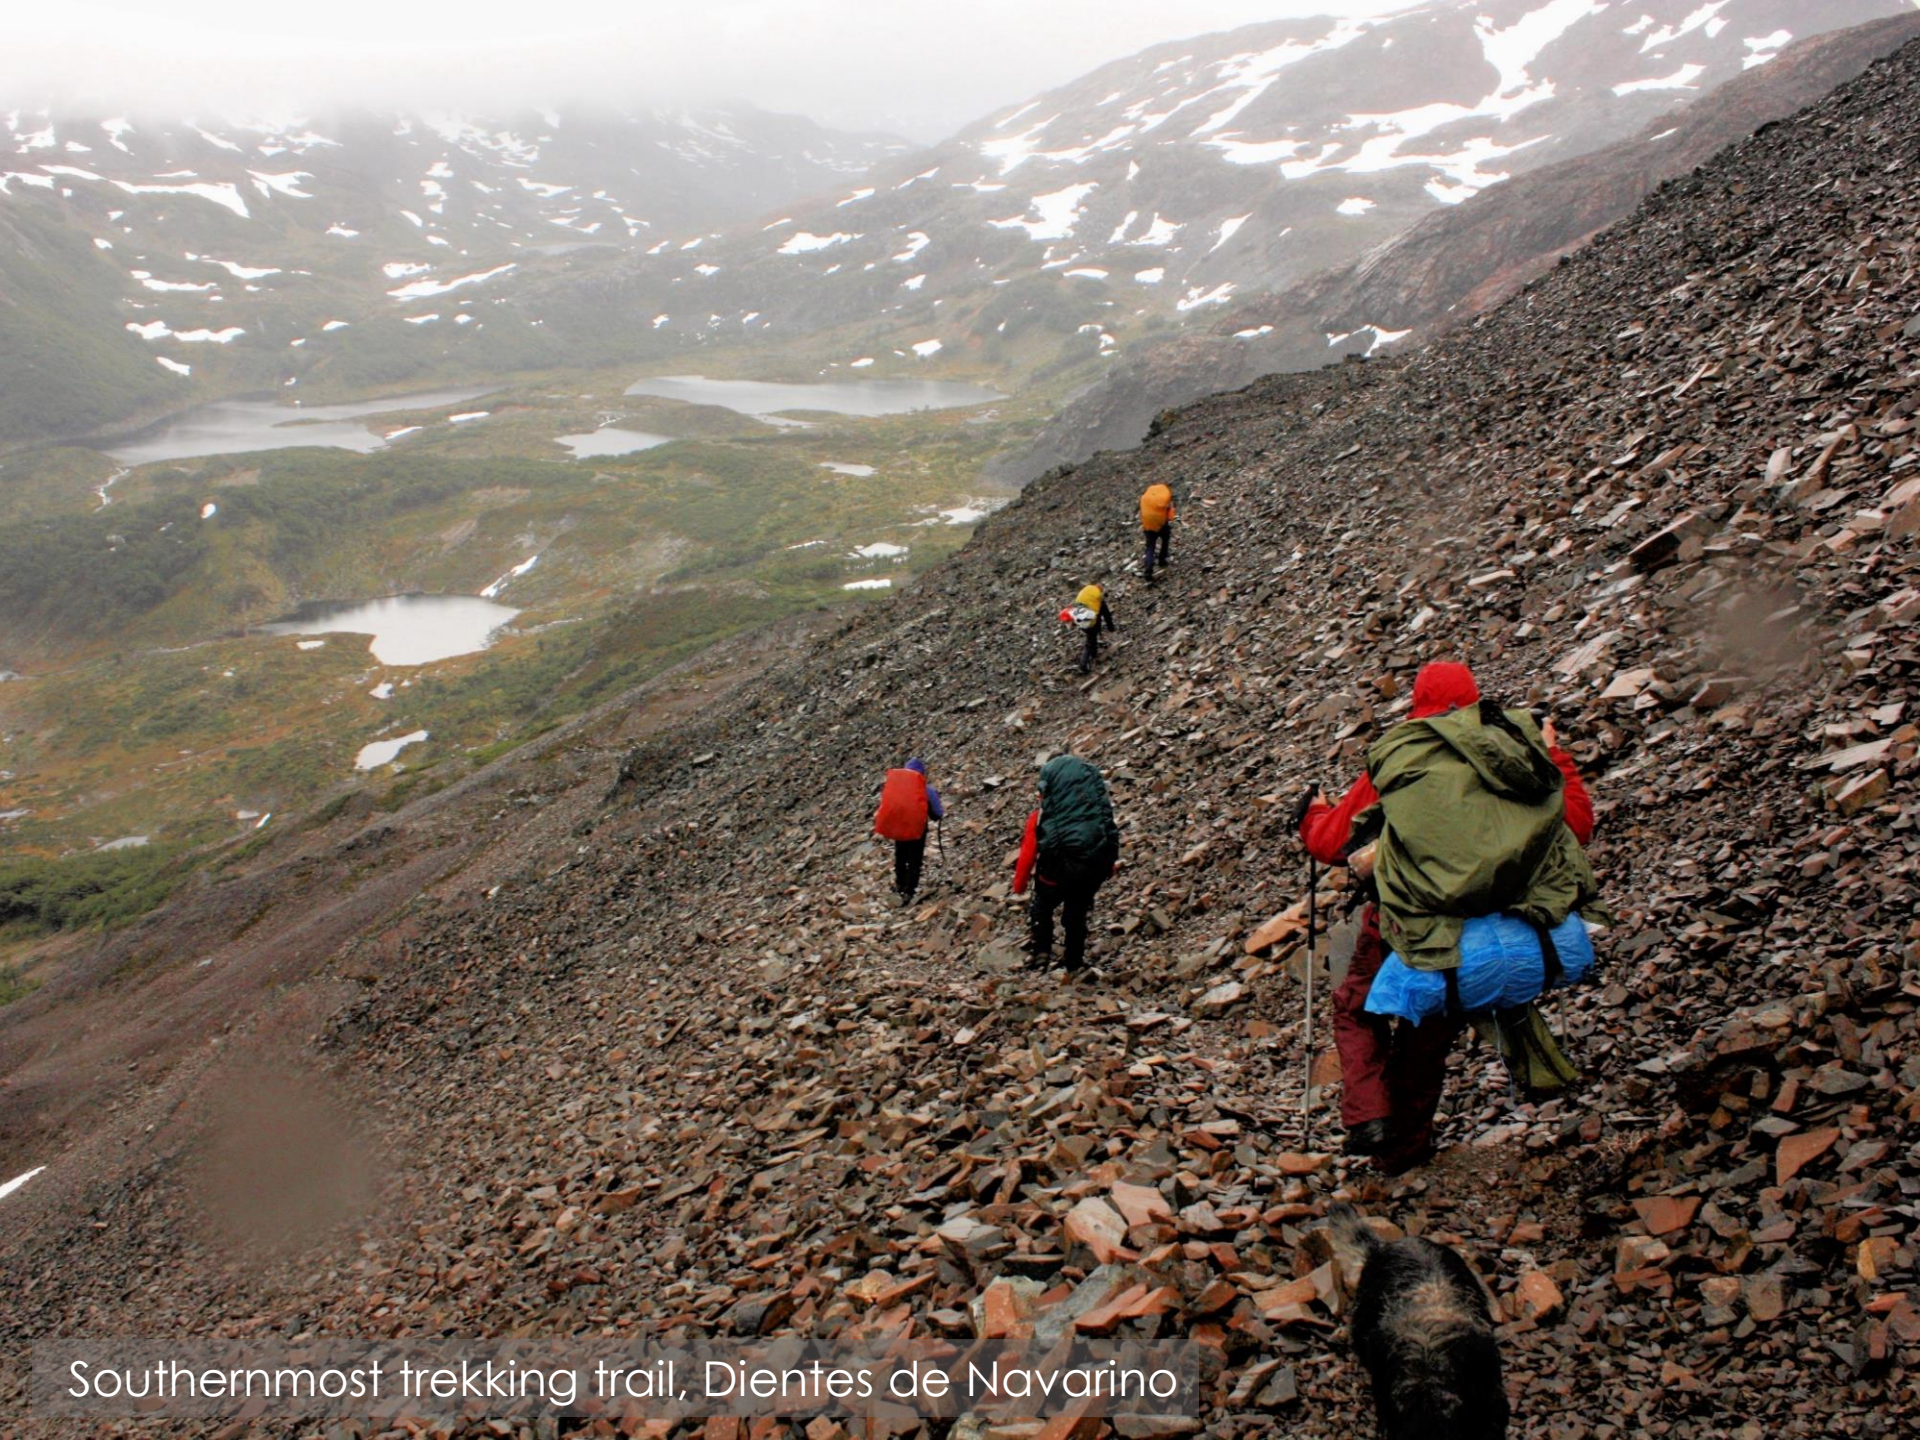

Southernmost trekking trail, Dientes de Navarino
