# Supplementary material for: Are Tourists Facilitators of the Movement of Free-Ranging Dogs?
Source: MDPI journal article supplement (doi:10.3390/ani12243564), 2022-12-16

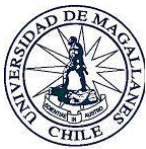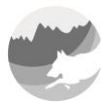

Perros  
Vagabundos  
Reserva de Biosfera  
Cabo de Hornos

## QUESTIONNAIRE FREE-RANGING DOGS HORN BIOSPHERE RESERVE

### A Experience with dogs

1. If you were trekking, did some village dogs follow you? Yes/no  
If yes, how many, for how long, and what do you think why? \_\_\_\_\_
2. Did you see dogs chasing another animal during your stay? Yes/no  
If yes, which one(s)? \_\_\_\_\_
3. Have you fed any dogs during your stay here?
  - a) daily
  - b) sometimes
  - c) never
4. Did you see free-ranging dogs outside the village? Yes/no  
If yes, how many? Where? *Could you please mark the numbers and locations in the map on the next page?*
5. On a scale from 0-10 how afraid are you of encountering free-ranging dogs outside the village (0=no fear, 10=high level of fear)? *Please mark:* 0 1 2 3 4 5 6 7 8 9 10
6. Did you experience problems with free-ranging dogs during your stay here? Yes/no  
If yes, which? \_\_\_\_\_
7. Do you have any other comments?  
\_\_\_\_\_  
\_\_\_\_\_

### B Personal background

8. Gender: ☐ Female ☐ Male
9. Age: \_\_\_\_\_
10. Nationality: \_\_\_\_\_
11. Highest completed education level:
  - a) none
  - b) elementary school
  - c) high school
  - d) technical/vocational training
  - e) University
12. Occupation: \_\_\_\_\_
13. Time spent in Puerto Williams up to date: \_\_\_\_\_
14. Reason for your visit of Navarino Island: \_\_\_\_\_

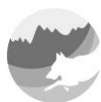

Reserva de Biosfera  
Cabo de Hornos

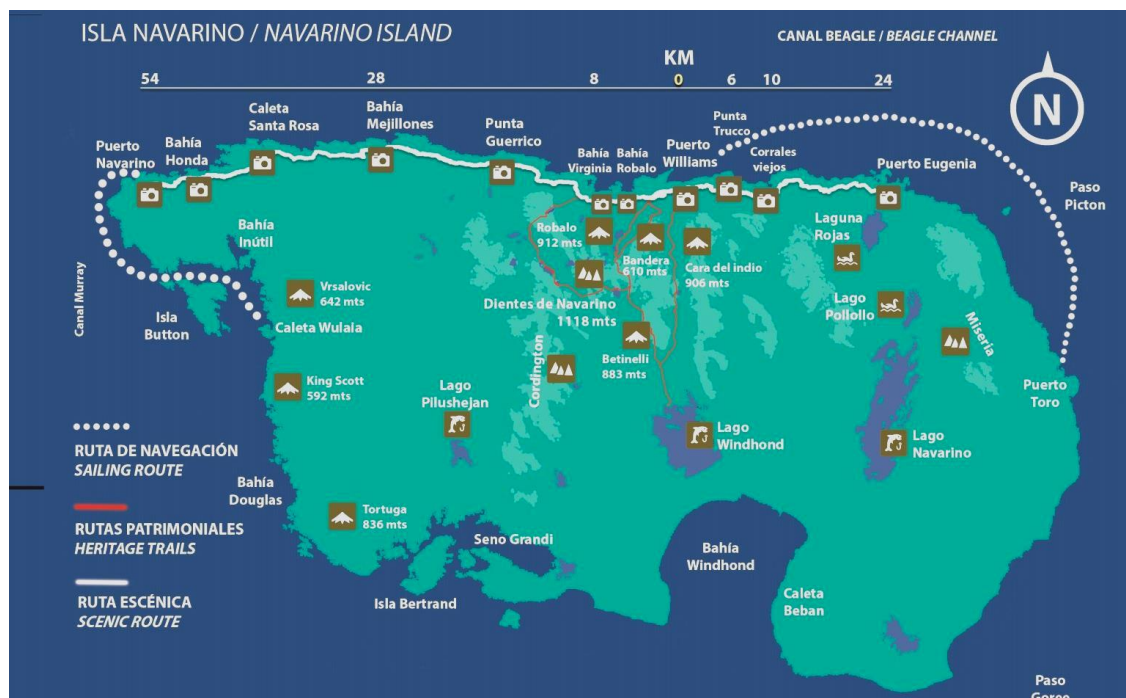

Supplement: s1 [file s1]
